# Supplementary material
Source: Springer Nature journal article supplement (https://www.springermedizin.de/resource/supplementary/13058_2012_3195_MOESM11_ESM.pdf/9703468)

■ Wip1 WT    ■ Wip1 KO

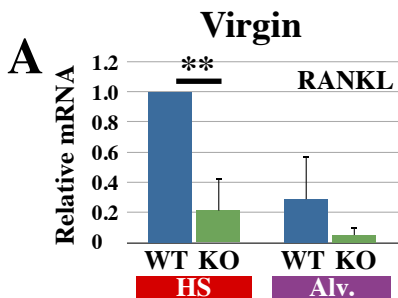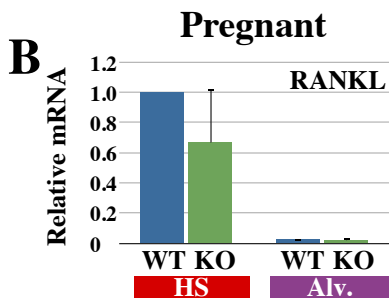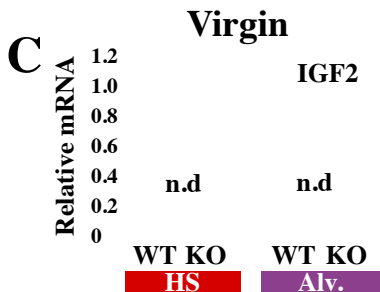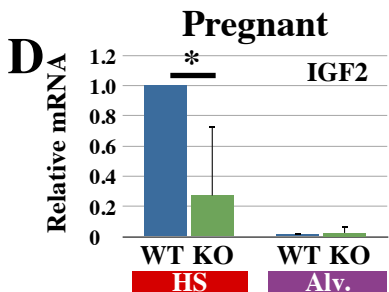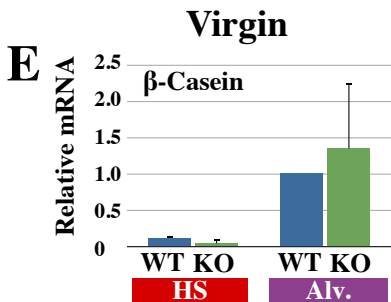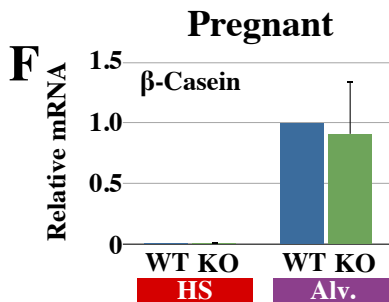

Supplement: MOESM11 [file 9703468]
